# Supplementary material for: Development of a gold nanoparticle based anti-aggregation method for rapid detection of mercury(ii) in aqueous solutions
Source: Royal Society of Chemistry journal article supplement (doi:10.1039/c4ay00627e), 2014-01-01
Supplement: c4ay00627e1.pdf [file c4ay00627e1.pdf]

## Electronic Supplementary Information

### Development of a Gold Nanoparticle Based Anti-aggregation Method for Rapid Detection of Mercury(II) in Aqueous Solutions

Genin Gary Huang\*, Yen-Ting Chen, and Yu-Rong Lin

*Department of Medicinal and Applied Chemistry, Kaohsiung Medical University,  
Kaohsiung, 807, Taiwan*

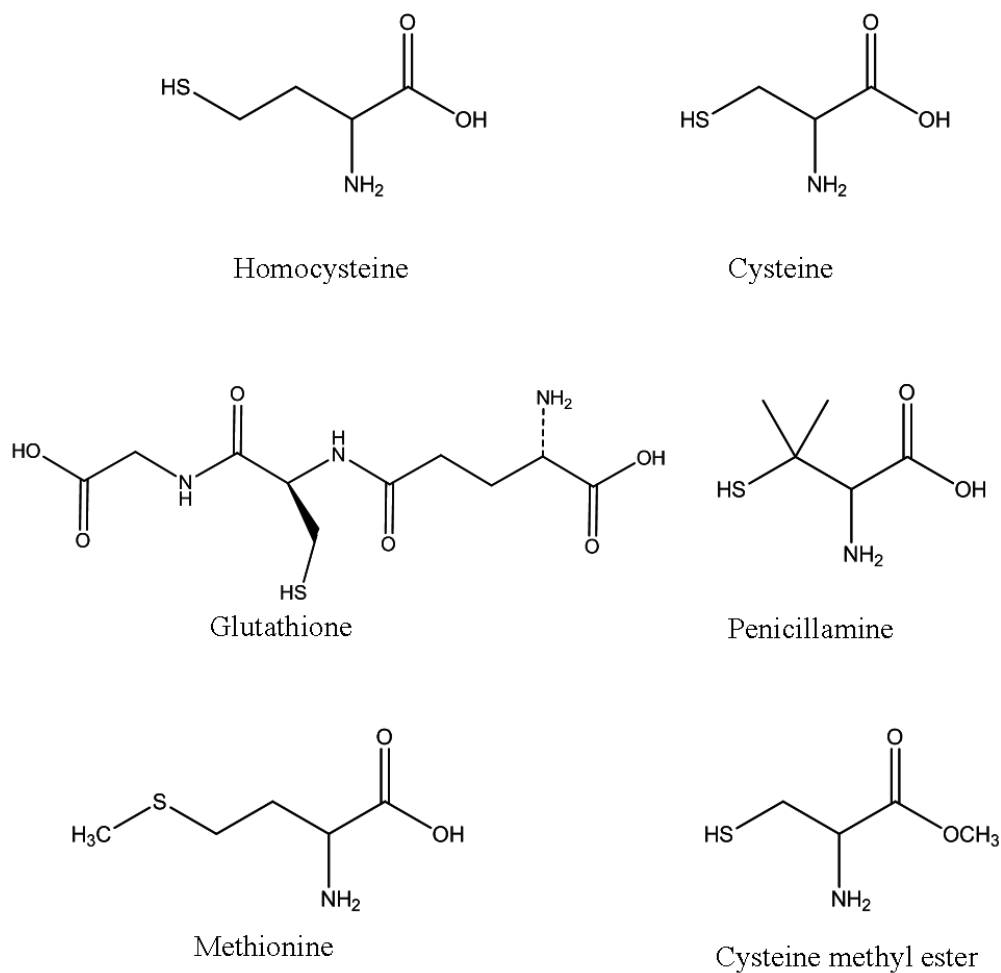

**Figure S1.** Structures of six aggregation agents used in this study.

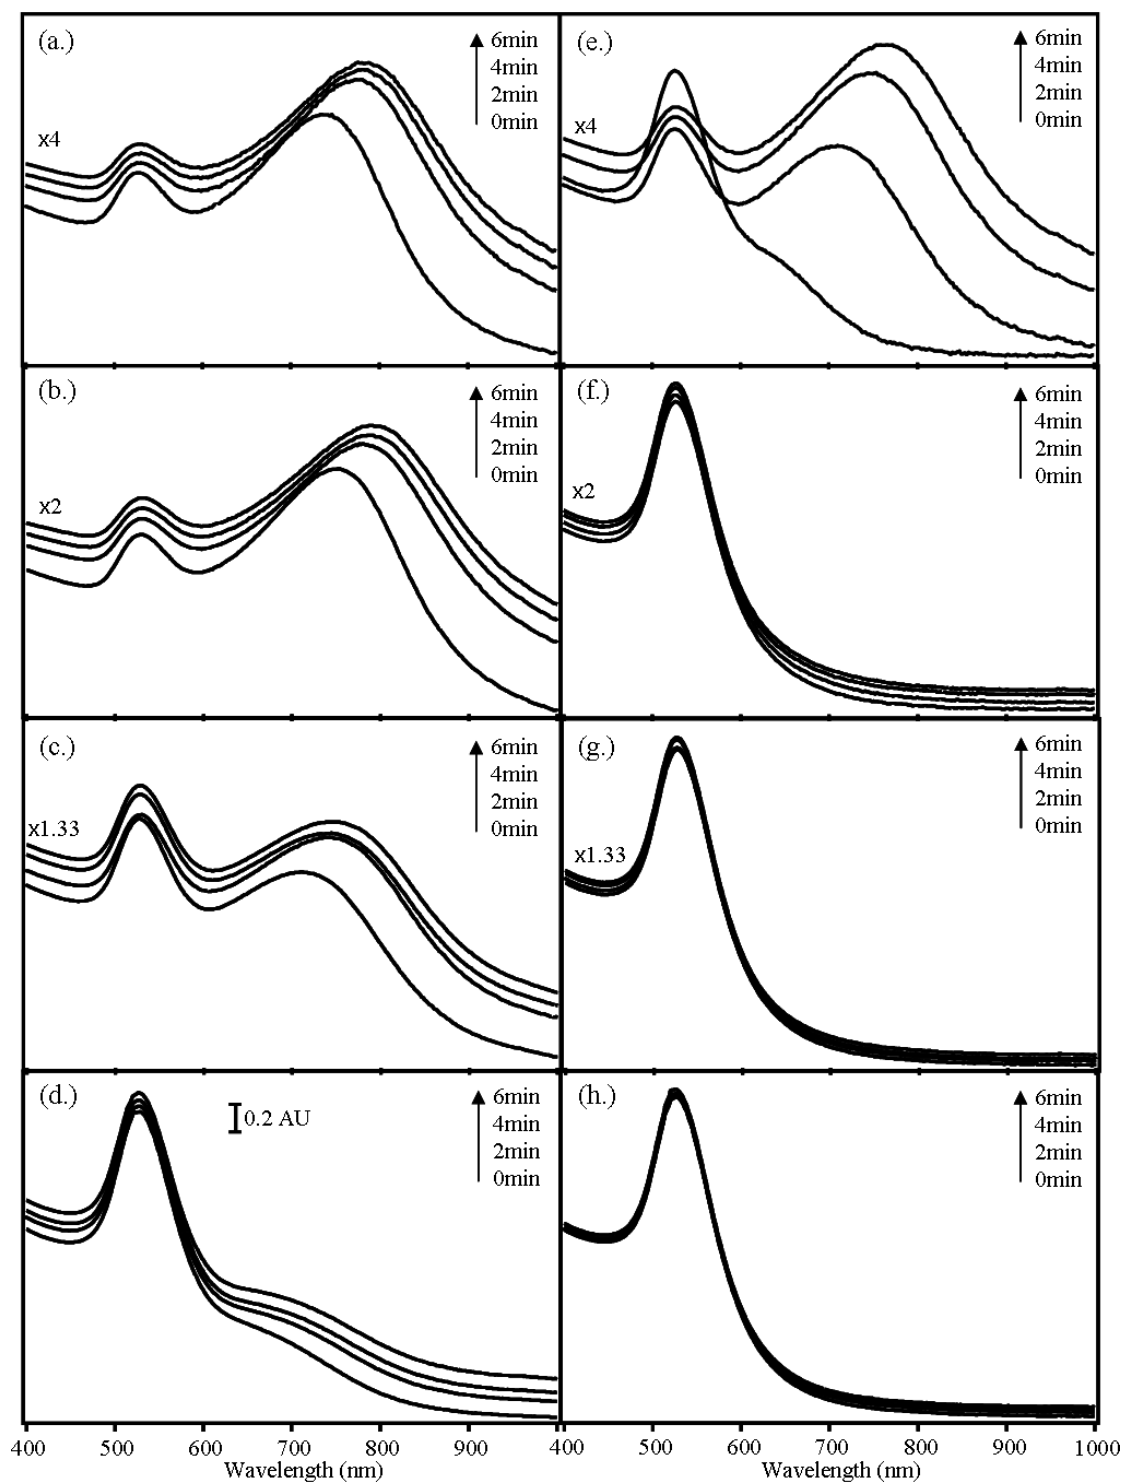

**Figure S2.** Extinction spectra of AuNPs under different gold nanoparticle concentrations (from top to bottom: 1.425 nM, 2.85 nM, 4.275 nM, and 5.7 nM) in the absence of  $\text{Hg}^{2+}$  (a~d) and in the presence of  $1 \mu\text{M Hg}^{2+}$  (e~h). The particle concentration of gold nanocolloids was 2.85 nM, l-penicillamine concentration was  $2 \mu\text{M}$ , the concentration of citrate buffer was 5 mM, the concentration of  $\text{Cl}^-$  was 10 mM, and the pH was 2.4.

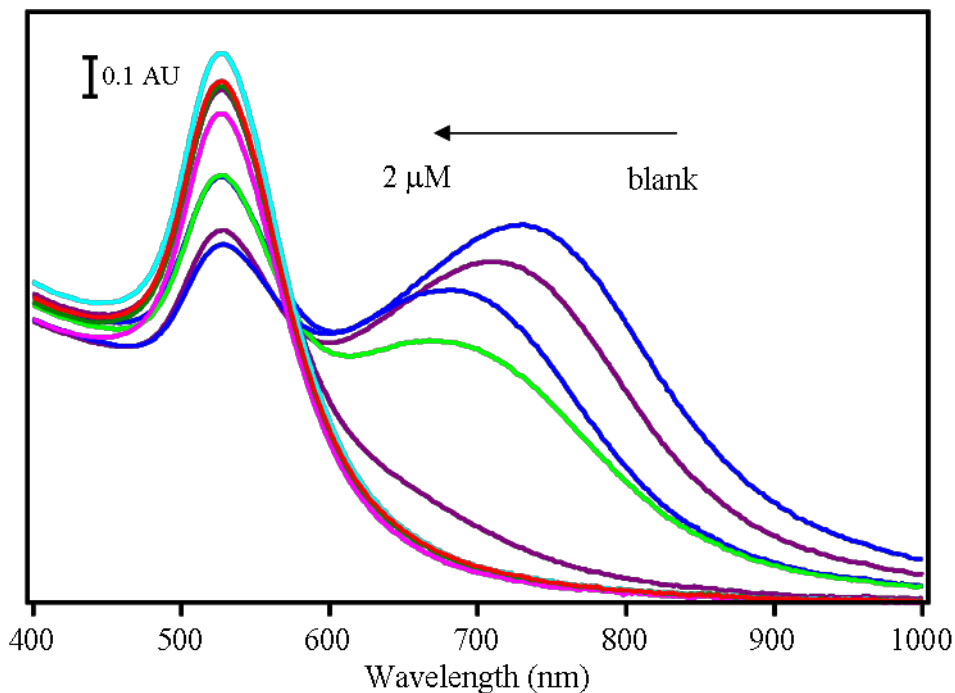

**Figure S3.** Extinction spectra of AuNPs in the presence of different concentrations of  $\text{Hg}^{2+}$ . The concentration of l-penicillamine was  $2 \mu\text{M}$ , the concentration of citrate buffer was  $5 \text{ mM}$ , the concentration of  $\text{Cl}^-$  was  $10 \text{ mM}$ , the pH was 2.4 and the incubation time was 2 min.

| Sample | Added<br>(nM) | Found<br>(nM) | Recovery<br>(%) | RSD<br>(%, n=3) |
|--------|---------------|---------------|-----------------|-----------------|
| 1      | 100           | 95.96         | 96.0            | 2.5             |
| 2      | 200           | 191.55        | 95.8            | 1.7             |
| 3      | 400           | 397.15        | 99.3            | 2.2             |

**Table S1.** Recovery of the proposed method for determination of  $\text{Hg}^{2+}$  in tap water samples.
